# Supplementary material for: Acceptability of HIV self-sampling kits (TINY vial) among people of black African ethnicity in the UK: a qualitative study
Source: PubMed Central journal article supplement (PMC5899406; doi:10.1186/s12889-018-5256-5), 2018-04-13
Supplement: 12889_2018_5256_MOESM1_ESM.pdf [file 12889_2018_5256_MOESM1_ESM.pdf]

## Thematic Coding Hierarchy

|                                           |                                                                    |                                       |
|-------------------------------------------|--------------------------------------------------------------------|---------------------------------------|
| TESTING IN GENERAL                        |                                                                    |                                       |
|                                           | Barriers                                                           |                                       |
|                                           | Shifts in perceptions of testing                                   |                                       |
| TRUST                                     |                                                                    |                                       |
| STIGMA                                    |                                                                    |                                       |
| PRIVACY                                   |                                                                    |                                       |
| TARGETING OF HSKs TO BLACK AFRICAN PEOPLE |                                                                    |                                       |
|                                           |                                                                    |                                       |
|                                           | Avoiding targeting                                                 |                                       |
|                                           | Limitations                                                        |                                       |
|                                           | Strengths                                                          |                                       |
| SELF TESTING IN GENERAL                   |                                                                    |                                       |
| SELF SAMPLING                             |                                                                    |                                       |
|                                           | DRIED BLOOD SPOT KITS                                              |                                       |
|                                           |                                                                    | Limitations                           |
|                                           |                                                                    | Strengths                             |
|                                           | TINY VIAL KITS                                                     |                                       |
|                                           |                                                                    |                                       |
|                                           |                                                                    | Likely users of SSK                   |
|                                           |                                                                    | Limitations                           |
|                                           |                                                                    |                                       |
|                                           |                                                                    | People who would potentially struggle |
|                                           |                                                                    | Strengths                             |
| INFORMATION AND INSTRUCTIONS              |                                                                    |                                       |
|                                           | Additional information - result management                         |                                       |
|                                           | Additional information - benefits of free treatment or living well |                                       |
|                                           | Additional information- video or DVD and web based resources       |                                       |
|                                           | Additional information-Local support services                      |                                       |
|                                           | Additional information-Meaning of Results                          |                                       |
|                                           | Additional support - phone line for pre-test anxiety and questions |                                       |
|                                           | Additional support - recorded voice instructions                   |                                       |
|                                           | Additional support - trainers need to show how SSK is used         |                                       |
|                                           | Font size                                                          |                                       |
|                                           | Language                                                           |                                       |
|                                           | Number of instructions                                             |                                       |
|                                           | Pretest counselling                                                |                                       |
| DISTRIBUTION                              |                                                                    |                                       |
|                                           | Barbershops or Hairdressers                                        |                                       |
|                                           |                                                                    | Limitations                           |
|                                           |                                                                    | Role in signposting                   |
|                                           |                                                                    | Strengths                             |
|                                           | Community Based organisations - specialist organisation            |                                       |
|                                           |                                                                    | Additional resources required (staff  |

|  |                                                     |                                                            |
|--|-----------------------------------------------------|------------------------------------------------------------|
|  |                                                     | training, cost, time)                                      |
|  |                                                     | Kit collection or distribution                             |
|  |                                                     | Limitations                                                |
|  |                                                     | Procedures                                                 |
|  |                                                     | Role in signposting                                        |
|  |                                                     | Sample Return                                              |
|  |                                                     | Strengths                                                  |
|  | Community Centres- not specialist org or individual |                                                            |
|  |                                                     | Limitations                                                |
|  |                                                     | Role in signposting                                        |
|  |                                                     | Strengths                                                  |
|  | Dental Surgeries                                    |                                                            |
|  |                                                     | Limitations                                                |
|  |                                                     | Strengths                                                  |
|  | Faith Based Settings                                |                                                            |
|  |                                                     | Limitations                                                |
|  |                                                     | Role in signposting                                        |
|  |                                                     | Strengths                                                  |
|  | GP Practice                                         |                                                            |
|  |                                                     | Additional resources required (staff training, cost, time) |
|  |                                                     | Kit collection or kit distribution                         |
|  |                                                     | Limitations                                                |
|  |                                                     | Procedures                                                 |
|  |                                                     | Sample Return                                              |
|  |                                                     | Strengths                                                  |
|  | HIV Prevention Outreach Workers                     |                                                            |
|  |                                                     | Additional resources required (staff training, cost, time) |
|  |                                                     | Kit collection or distribution                             |
|  |                                                     | Limitations                                                |
|  |                                                     | Procedures                                                 |
|  |                                                     | Role in signposting                                        |
|  |                                                     | Sample Return                                              |
|  |                                                     | Strengths                                                  |
|  | Home                                                |                                                            |
|  |                                                     | Limitations                                                |
|  |                                                     | Strengths                                                  |
|  | Other settings                                      |                                                            |
|  |                                                     | distribution at sexual health centres                      |
|  |                                                     | Distribution in local businesses or markets or nightclubs  |
|  |                                                     | Role in signposting                                        |
|  |                                                     |                                                            |
|  | Personal interaction at settings                    |                                                            |
|  | Pharmacy                                            |                                                            |
|  |                                                     | Additional resources required (staff training, cost, time) |
|  |                                                     | Kit collection or distribution                             |
|  |                                                     | Limitations                                                |
|  |                                                     | Procedures                                                 |
|  |                                                     | Sample Return                                              |
|  |                                                     | Strengths                                                  |
|  | Universities                                        |                                                            |

|                                     |                                                         |                     |
|-------------------------------------|---------------------------------------------------------|---------------------|
|                                     |                                                         | Limitations         |
|                                     |                                                         | Role in signposting |
|                                     |                                                         | Strengths           |
|                                     | Ranking of settings                                     |                     |
| LOCATIONS FOR SAMPLE RETURN         |                                                         |                     |
|                                     | Any SSK distributor                                     |                     |
|                                     | Individuals post sample to lab                          |                     |
|                                     | Other signposting organisations or businesses           |                     |
| LOCATIONS FOR TAKING THE SSK SAMPLE |                                                         |                     |
|                                     | Consultation Room                                       |                     |
|                                     | Home                                                    |                     |
|                                     | Office                                                  |                     |
|                                     | Toilet                                                  |                     |
| PACKAGING                           |                                                         |                     |
| CLINICAL GOVERNANCE                 |                                                         |                     |
|                                     | Additional Testing                                      |                     |
|                                     | HIV prevention or risk reduction advice                 |                     |
|                                     | Involvement of health professionals                     |                     |
|                                     | Patient Management                                      |                     |
|                                     | Personal Information at KIT collection                  |                     |
|                                     | Provision for those whose first language is not English |                     |
|                                     | Results Management                                      |                     |
| CONTEXTUAL ISSUES                   |                                                         |                     |
|                                     | Domestic Violence                                       |                     |
|                                     | Health promotion                                        |                     |
|                                     | Other                                                   |                     |
